# Supplementary material
Source: MDPI journal article supplement (https://www.mdpi.com/2072-666X/4/3/321)
Supplement: s1 [file s1]

# Supplementary Materials

## 1. Supplementary Methods

*Single-Cell MDA.* A schematic of the microdevice is in Figure S1. The device is composed of PDMS and consists of two layers of architecture. The top layer contains 10  $\mu\text{m}$ -tall channels (black) used to move cells and reagents within the chip, as well as 25  $\mu\text{m}$ -tall chambers (blue) that comprise the MDA microreactors. The bottom layer contains a 25  $\mu\text{m}$ -tall control architecture for the pneumatic valves (red) as well as 15  $\mu\text{m}$ -tall hydration lines (green), used to prevent evaporation in the microreactors. The chip is mounted to a thin glass coverslip. Poly(dimethylsiloxane) (PDMS) was purchased from R.S. Hughes (Sunnyvale, CA, USA).

The chip was placed on an inverted microscope (Nikon Eclipse TE2000-U, Melville, NY, USA) and imaged in real-time via an EM-CCD camera (Andor iXon+, Belfast, UK). Cells were visualized via laser-induced fluorescence emission using a laser beam, 25 mW at 638 nm (CrystaLaser, Reno, NV, USA), expanded to a square imaging field. The device was placed on a precisely movable stage (Lstep Märzhäuser, Wetzlar, Germany), which was controlled remotely by a computer program. scMDA of *Synechocystis* was conducted using the new lysis protocol described below.

400  $\mu\text{L}$  of *Synechocystis* was extracted from a whole culture and subjected to pre-lysis. Following centrifugation and removal of the supernatant, the pellet was washed five times in 400  $\mu\text{L}$  TES buffer to reduce exogenous sample DNA. Supernatants were saved for quantification of exogenous nucleic acid fragments. The pellet was resuspended in 400  $\mu\text{L}$  PBS buffer and then diluted by a factor of 200 into Injection Buffer, phosphate-buffered saline (PBS) containing 0.1% Tween-20. Tween-20 was used to prevent adhesion of the cells to PDMS channel surfaces.

After placing a microfluidic chip on the inverted microscope and preparing it for use, the inlet of the main cell flow channel was injected with 10  $\mu\text{L}$  of injection buffer and filled via negative pressure. Excess injection buffer was removed from the inlet and replaced with 10  $\mu\text{L}$  of the cell suspension, diluted by a factor of 200 in Injection Buffer.

Single cells were moved through the main cell flow channel via negative pressure. Once a cell reached an intersection neighboring a microreactor entrance (Figure S1-1), it was isolated via actuation of pneumatic valves. The cross-flow of Lysis buffer, SoluLyse containing 200 U/ $\mu\text{L}$  lysozyme, was used to capture the cell and fill the 3.0-nL lysis chamber (Figure S1-2). Two of the eight microreactors on each chip were designated as negative controls for detection of sample exogenous DNA. No cell, only the diluted suspension in injection buffer, was captured with lysis buffer in these negative controls. Addition of Qiagen Repli-G DLB, Stop, and Master Mix reagents were added as described in the main text. The chip was incubated for 16 h at 34 °C on a hot plate. TES Buffer, SoluLyse, TE Buffer, and water used in the Master Mix for first- and second-round amplification were filtered with 0.2- $\mu\text{m}$  filters prior to use and exposed to UV for one hour.

After MDA incubation, the samples were extracted from the chip by injecting TE Buffer, pH 8.0, into the microreactors via the reagent-addition channels, thus pushing the reaction volume through the microreactor outlets (Figure S1-6) of the chip. A 20- $\mu\text{L}$  gel-loading pipette tip was inserted into each outlet to receive the sample. The sample was extracted until 5  $\mu\text{L}$  of TE Buffer had been passed through each microreactor, denoted by a mark on the pipette tip. The pipette tip was then pinched shut

with tweezers and moved into a 200- $\mu$ L Eppendorf Tube, into which the diluted sample was injected. The sample was stored at 4 °C with minimum light exposure.

## 2. Supplementary Figures

**Figure S1.** Schematic of one of eight replicate microreactors in the microfluidic scMDA chip. Red and yellow colors represent pneumatic valve control and hydration line architecture on the bottom layer, respectively. The two layers are separated by a PDMS membrane. A cell is captured at (1) and moved to (2) for lysis with lysis buffer. Addition of alkaline DLB increases volume to (3), completes lysis, and denatures DNA. Addition of Stop buffer increases volume to (4) and neutralizes pH. Addition of Master Mix increases volume to (5). Amplification is conducted at 33 °C for 16 h. Amplified DNA is extracted with TE Buffer through (6). Black and blue colors represent channel and chamber architecture on the top layer, respectively.

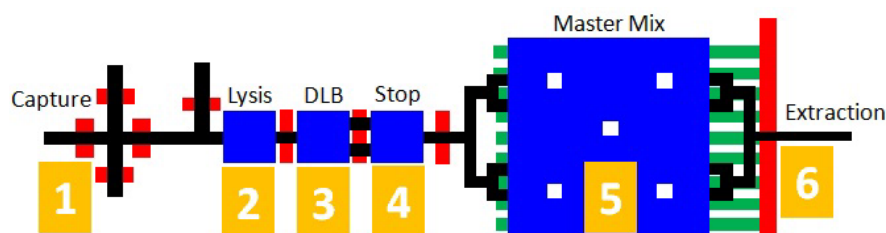

**Figure S2.** Amplification factors from microscale and macroscale MDA reactions. Amounts of produced DNA were quantified via PicoGreen assay. The amount of the template DNA for 60-nL reaction was calculated to be 50 attograms, derived from the estimated genome copy number of *Synechocystis* and the known size of the genome.

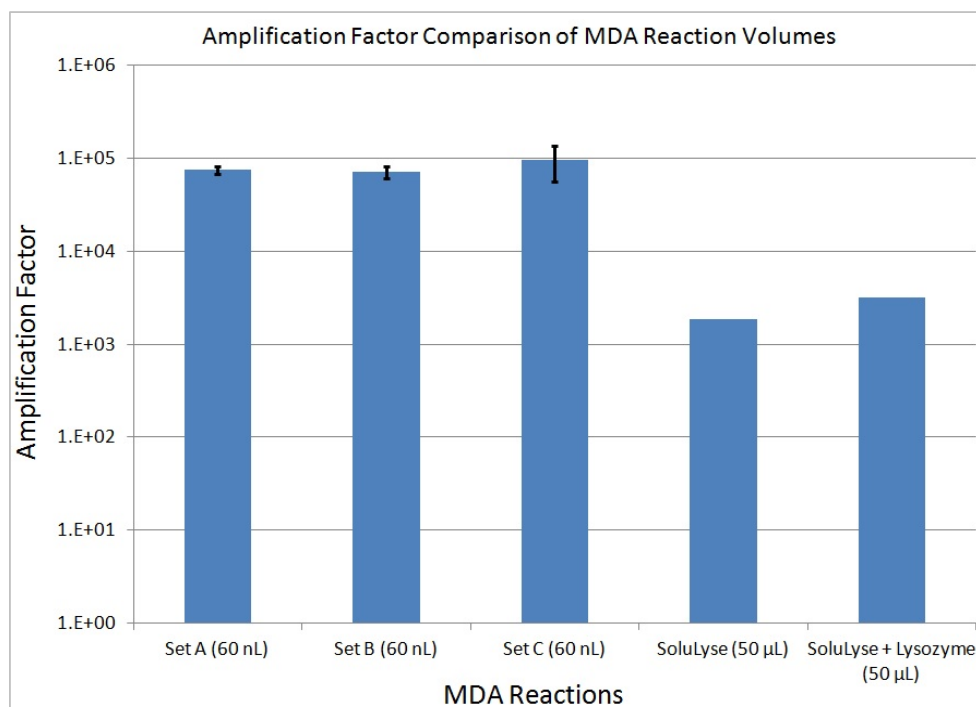

**Table S1.** Coverage primers for *Synechocystis* sp. PCC 6803.

| Primer# | Locus ID | Gene Name                                                     | Sequencing & PCR Primer | T <sub>m</sub> (°C) | Product Size | Start Position | End Position |
|---------|----------|---------------------------------------------------------------|-------------------------|---------------------|--------------|----------------|--------------|
| 1F      | slr0611  | sds solanesyl diphosphate synthase                            | AGGGCGGCGATCACCCCAA     | 60.8                | 1003         | 3573152        | 684          |
| 1R      |          |                                                               | GCCAGTTGCGCTTGGTTCGC    | 60.0                |              |                |              |
| 2F      | slr1291  | NAD(P)H-quinone oxidoreductase subunit 4                      | TTGGCGTGTTTCGTGGCCCAG   | 60.2                | 1057         | 286543         | 287599       |
| 2R      |          |                                                               | ATGGCATTGCCGGGGAGCAC    | 60.0                |              |                |              |
| 3F      | sll1009  | frpC iron-regulated protein                                   | GTCATTGCCGTGACCGCCCA    | 60.0                | 1020         | 506729         | 507748       |
| 3R      |          |                                                               | GCGAGTGCTGGTGGTGGCAT    | 60.0                |              |                |              |
| 4F      | sll1920  | cation-transporting ATPase E1–E2 ATPase                       | GTCCTGCCACCCACAACCG     | 59.9                | 1022         | 765029         | 766050       |
| 4R      |          |                                                               | GGGCACCAAGTGCGGCGTATT   | 60.0                |              |                |              |
| 5F      | sll1453  | nrtD nitrate transport protein NrtD                           | CGGTTGCGGGGACGGTCAAA    | 59.9                | 1001         | 1005440        | 1006440      |
| 5R      |          |                                                               | CGGGTACGCCGTCCTGACCT    | 60.3                |              |                |              |
| 6F      | sll2010  | UDP- <i>N</i> -acetylmuramoyl-L-alanyl-D-glutamate synthetase | GCACAGGCCGGGAAAGCAA     | 60.2                | 1102         | 1256978        | 1258079      |
| 6R      |          |                                                               | AGGAAGCTTGCCCCGAACGC    | 60.0                |              |                |              |
| 7F      | slr0260  | cobA cob(I)yrinic acid a,c-diamide adenosyltransferase        | GCCTGGGAACCGGCGGAAAA    | 59.9                | 1040         | 1507694        | 1508733      |
| 7R      |          |                                                               | GGCATCGGCAGTGAGCAGGG    | 60.1                |              |                |              |
| 8F      | sll1245  | cytochrome; CytM                                              | TCTGGGACCGCGTTGGGAT     | 59.9                | 1166         | 1750788        | 1751953      |
| 8R      |          |                                                               | CATCTGGTTGCGGAGGGCCG    | 60.1                |              |                |              |
| 9F      | slr0946  | arsC arsenate reductase                                       | CGTGCGGGGCCAGGTAAAGG    | 60.0                | 1100         | 2012572        | 2013671      |
| 9R      |          |                                                               | CCCACCACATCGGAACGGGC    | 60.0                |              |                |              |
| 10F     | slr1950  | cation-transporting ATPase E1–E2 ATPase                       | CGGTTAGTGGGGCGGGGAGA    | 60.0                | 1050         | 2254850        | 2255899      |
| 10R     |          |                                                               | GGTGGCCTTGCTTCCGGTC     | 60.0                |              |                |              |
| 11F     | sll0006  | aspartate aminotransferase                                    | CCCACGGGACAGGGAACCCA    | 60.1                | 1176         | 2494383        | 2495558      |
| 11R     |          |                                                               | CGGCAATGGGCCCTGGCTTT    | 60.2                |              |                |              |
| 12F     | slr0897  | endo-1,4-β-glucanase                                          | TGGCGGGGAGATTCCGGGTT    | 59.9                | 1124         | 2767405        | 2768528      |
| 12R     |          |                                                               | CGGAAACCGTCCCAGCCCAC    | 60.0                |              |                |              |
| 13F     | slr0118  | thiamine biosynthesis protein ThiC                            | CTCCGTCCCGGCTGTACCCA    | 60.0                | 1032         | 2999892        | 3000923      |
| 13R     |          |                                                               | GGCGGCCCCCATATCCATGC    | 60.0                |              |                |              |

Table S1. Cont.

|     |         |                                   |                      |      |      |         |         |
|-----|---------|-----------------------------------|----------------------|------|------|---------|---------|
| 14F | slr0550 | dapA dihydrodipicolinate synthase | TGCGGCCAAGTTGGGAGTGG | 59.6 | 1065 | 3249682 | 3250746 |
| 14R |         |                                   | TTGGAGCCGGTGGGGAGAGG | 59.9 |      |         |         |
| 15F | slr0452 | ilvD dihydroxy-acid dehydratase   | CATGCTCCGGGCGTGGTT   | 60.0 | 1115 | 3498965 | 3500079 |
| 15R |         |                                   | CACTGCCTTCGGTGGCCAGG | 60.0 |      |         |         |

Table S2. BLAST result for scMDA amplicon sequences.

Set A. *Synechocystis* sp. 6803 coverage sequences.

| Sample | Primer | Organism                          | Protein                                              | Identity | Query Coverage |
|--------|--------|-----------------------------------|------------------------------------------------------|----------|----------------|
| 1      | 1F     | <i>Synechocystis</i> sp. PCC 6803 | thiol:disulfide interchange protein DsbD             | 91%      | 82%            |
| 1      | 1R     | <i>Synechocystis</i> sp. PCC 6803 | thiol:disulfide interchange protein DsbD             | 97%      | 41%            |
| 1      | 2F     | <i>Synechocystis</i> sp. PCC 6803 | NAD(P)H-quinone oxidoreductase subunit 4             | 99%      | 98%            |
| 1      | 2R     | <i>Synechocystis</i> sp. PCC 6803 | NAD(P)H-quinone oxidoreductase subunit 4             | 99%      | 98%            |
| 1      | 5F     | <i>Synechocystis</i> sp. PCC 6803 | nitrate transport protein NrtD                       | 99%      | 98%            |
| 1      | 5R     | <i>Synechocystis</i> sp. PCC 6803 | nitrate transport protein NrtD                       | 97%      | 63%            |
| 1      | 6F     | <i>Synechocystis</i> sp. PCC 6803 | UDP-N-acetylmuramoyl-L-alanyl-D-glutamate synthetase | 98%      | 95%            |
| 1      | 6R     | <i>Synechocystis</i> sp. PCC 6803 | UDP-N-acetylmuramoyl-L-alanyl-D-glutamate synthetase | 99%      | 99%            |
| 1      | 7F     | <i>Synechocystis</i> sp. PCC 6803 | hypothetical protein                                 | 98%      | 37%            |
| 1      | 7R     | <i>Synechocystis</i> sp. PCC 6803 | cob(I)yrinic acid a,c-diamide adenosyltransferase    | 92%      | 47%            |
| 1      | 13F    | <i>Synechocystis</i> sp. PCC 6803 | thiamine biosynthesis protein ThiC                   | 98%      | 82%            |
| 1      | 13R    | <i>Synechocystis</i> sp. PCC 6803 | thiamine biosynthesis protein ThiC                   | 99%      | 61%            |
| 2      | 1F     | <i>Synechocystis</i> sp. PCC 6803 | solanesyl diphosphate synthase                       | 97%      | 84%            |
| 2      | 1R     | <i>Synechocystis</i> sp. PCC 6803 | solanesyl diphosphate synthase                       | 98%      | 94%            |
| 2      | 7F     | <i>Synechocystis</i> sp. PCC 6803 | extracellular nuclease                               | 99%      | 95%            |
| 2      | 7R     | <i>Synechocystis</i> sp. PCC 6803 | extracellular nuclease                               | 99%      | 95%            |
| 4      | 5F     | <i>Synechocystis</i> sp. PCC 6803 | nitrate transport protein NrtD                       | 98%      | 99%            |
| 4      | 5R     | <i>Synechocystis</i> sp. PCC 6803 | nitrate transport protein NrtD                       | 99%      | 96%            |
| 4      | 8F     | <i>Synechocystis</i> sp. PCC 6803 | cytochrome; CytM                                     | 96%      | 67%            |
| 4      | 8R     | <i>Synechocystis</i> sp. PCC 6803 | 50S ribosomal protein L9                             | 93%      | 48%            |

Table S2. Set A. Cont.

|   |     |                                   |                                                               |     |     |
|---|-----|-----------------------------------|---------------------------------------------------------------|-----|-----|
| 6 | 1F  | <i>Synechocystis</i> sp. PCC 6803 | solanesyl diphosphate synthase                                | 98% | 93% |
| 6 | 1R  | <i>Synechocystis</i> sp. PCC 6803 | solanesyl diphosphate synthase                                | 99% | 96% |
| 6 | 3F  | <i>Synechocystis</i> sp. PCC 6803 | iron-regulated protein                                        | 99% | 96% |
| 6 | 3R  | <i>Synechocystis</i> sp. PCC 6803 | iron-regulated protein                                        | 99% | 97% |
| 6 | 4F  | <i>Synechocystis</i> sp. PCC 6803 | cation-transporting ATPase E1–E2 ATPase                       | 99% | 99% |
| 6 | 4R  | <i>Synechocystis</i> sp. PCC 6803 | cation-transporting ATPase E1–E2 ATPase                       | 99% | 97% |
| 6 | 5F  | <i>Synechocystis</i> sp. PCC 6803 | nitrate transport protein NrtD                                | 99% | 98% |
| 6 | 5R  | <i>Synechocystis</i> sp. PCC 6803 | nitrate transport protein NrtD                                | 99% | 98% |
| 6 | 6F  | <i>Synechocystis</i> sp. PCC 6803 | UDP- <i>N</i> -acetylmuramoyl-L-alanyl-D-glutamate synthetase | 98% | 97% |
| 6 | 6R  | <i>Synechocystis</i> sp. PCC 6803 | UDP- <i>N</i> -acetylmuramoyl-L-alanyl-D-glutamate synthetase | 99% | 96% |
| 6 | 7F  | <i>Synechocystis</i> sp. PCC 6803 | cob(I)yrinic acid a,c-diamide adenosyltransferase             | 99% | 99% |
| 6 | 7R  | <i>Synechocystis</i> sp. PCC 6803 | cob(I)yrinic acid a,c-diamide adenosyltransferase             | 97% | 93% |
| 6 | 8F  | <i>Synechocystis</i> sp. PCC 6803 | cytochrome; CytM                                              | 95% | 66% |
| 6 | 8R  | <i>Synechocystis</i> sp. PCC 6803 | 50S ribosomal protein L9                                      | 87% | 32% |
| 6 | 10F | <i>Synechocystis</i> sp. PCC 6803 | cation-transporting ATPase E1–E2 ATPase                       | 97% | 50% |
| 6 | 10R | <i>Synechocystis</i> sp. PCC 6803 | cation-transporting ATPase E1–E2 ATPase                       | 93% | 53% |
| 6 | 11F | <i>Synechocystis</i> sp. PCC 6803 | aspartate aminotransferase                                    | 99% | 71% |
| 6 | 11R | <i>Synechocystis</i> sp. PCC 6803 | aspartate aminotransferase                                    | 98% | 95% |
| 6 | 13F | <i>Synechocystis</i> sp. PCC 6803 | thiamine biosynthesis protein ThiC                            | 99% | 95% |
| 6 | 13R | <i>Synechocystis</i> sp. PCC 6803 | thiamine biosynthesis protein ThiC                            | 99% | 96% |
| 8 | 1F  | <i>Synechocystis</i> sp. PCC 6803 | solanesyl diphosphate synthase                                | 99% | 65% |
| 8 | 1R  | <i>Synechocystis</i> sp. PCC 6803 | solanesyl diphosphate synthase                                | 97% | 65% |
| 8 | 2F  | No similarity found               |                                                               |     |     |
| 8 | 2R  | No similarity found               |                                                               |     |     |
| 8 | 3F  | <i>Synechocystis</i> sp. PCC 6803 | iron-regulated protein                                        | 96% | 88% |
| 8 | 3R  | <i>Synechocystis</i> sp. PCC 6803 | iron-regulated protein                                        | 96% | 93% |
| 8 | 4F  | <i>Synechocystis</i> sp. PCC 6803 | cation-transporting ATPase E1–E2 ATPase                       | 99% | 97% |
| 8 | 4R  | <i>Synechocystis</i> sp. PCC 6803 | cation-transporting ATPase E1–E2 ATPase                       | 99% | 97% |

Table S2. Set A. Cont.

|   |     |                                   |                                                               |     |     |
|---|-----|-----------------------------------|---------------------------------------------------------------|-----|-----|
| 8 | 5F  | <i>Synechocystis</i> sp. PCC 6803 | nitrate transport protein NrtD                                | 99% | 99% |
| 8 | 5R  | <i>Synechocystis</i> sp. PCC 6803 | nitrate transport protein NrtD                                | 99% | 98% |
| 8 | 6F  | <i>Synechocystis</i> sp. PCC 6803 | UDP- <i>N</i> -acetylmuramoyl-L-alanyl-D-glutamate synthetase | 97% | 97% |
| 8 | 6R  | <i>Synechocystis</i> sp. PCC 6803 | UDP- <i>N</i> -acetylmuramoyl-L-alanyl-D-glutamate synthetase | 98% | 97% |
| 8 | 7F  | <i>Synechocystis</i> sp. PCC 6803 | cob(I)yrinic acid a,c-diamide adenosyltransferase             | 98% | 99% |
| 8 | 7R  | <i>Synechocystis</i> sp. PCC 6803 | cob(I)yrinic acid a,c-diamide adenosyltransferase             | 98% | 98% |
| 8 | 8F  | <i>Synechocystis</i> sp. PCC 6803 | cytochrome; CytM                                              | 94% | 93% |
| 8 | 8R  | No similarity found               |                                                               |     |     |
| 8 | 12F | <i>Synechocystis</i> sp. PCC 6803 | endo-1,4- $\beta$ -glucanase                                  | 97% | 97% |
| 8 | 12R | <i>Synechocystis</i> sp. PCC 6803 | endo-1,4- $\beta$ -glucanase                                  | 99% | 95% |
| 8 | 13F | <i>Synechocystis</i> sp. PCC 6803 | thiamine biosynthesis protein ThiC                            | 98% | 99% |
| 8 | 13R | <i>Synechocystis</i> sp. PCC 6803 | thiamine biosynthesis protein ThiC                            | 99% | 99% |

Set B. *Synechocystis* sp. 6803 coverage sequences.

| Sample | Primer | Organism                          | Protein                                 | Identity | Query Coverage |
|--------|--------|-----------------------------------|-----------------------------------------|----------|----------------|
| 1      | 15F    | No similarity found               |                                         |          |                |
| 1      | 15R    | No similarity found               |                                         |          |                |
| 5      | 2F     | No similarity found               |                                         |          |                |
| 5      | 2R     | <i>Synechocystis</i> sp. PCC 6803 | NADH dehydrogenase subunit 4            | 98%      | 82%            |
| 5      | 3F     | <i>Synechocystis</i> sp. PCC 6803 | iron-regulated protein                  | 95%      | 73%            |
| 5      | 3R     | <i>Synechocystis</i> sp. PCC 6803 | iron-regulated protein                  | 94%      | 76%            |
| 5      | 4F     | <i>Synechocystis</i> sp. PCC 6803 | cation-transporting ATPase E1–E2 ATPase | 97%      | 96%            |
| 5      | 4R     | <i>Synechocystis</i> sp. PCC 6803 | cation-transporting ATPase E1–E2 ATPase | 98%      | 92%            |
| 5      | 5F     | <i>Synechocystis</i> sp. PCC 6803 | plasmid pSYSX                           | 84%      | 48%            |
| 5      | 5R     | No similarity found               |                                         |          |                |
| 5      | 8F     | <i>Synechocystis</i> sp. PCC 6803 | cytochrome CytM                         | 99%      | 84%            |
| 5      | 8R     | <i>Synechocystis</i> sp. PCC 6803 | 50S ribosomal protein L9                | 88%      | 15%            |
| 5      | 11F    | <i>Synechocystis</i> sp. PCC 6803 | aspartate aminotransferase              | 96%      | 70%            |
| 5      | 11R    | <i>Synechocystis</i> sp. PCC 6803 | aspartate aminotransferase              | 94%      | 85%            |

**Table S2.** Set B. *Cont.*

|   |     |                                   |                                                   |     |     |
|---|-----|-----------------------------------|---------------------------------------------------|-----|-----|
| 5 | 13F | <i>Synechocystis</i> sp. PCC 6803 | thiamine biosynthesis protein ThiC                | 93% | 76% |
| 5 | 13R | <i>Synechocystis</i> sp. PCC 6803 | thiamine biosynthesis protein ThiC                | 89% | 65% |
| 6 | 1F  | <i>Synechocystis</i> sp. PCC 6803 | solanesyl diphosphate synthase                    | 98% | 60% |
| 6 | 1R  | <i>Synechocystis</i> sp. PCC 6803 | solanesyl diphosphate synthase                    | 95% | 62% |
| 6 | 8F  | <i>Synechocystis</i> sp. PCC 6803 | cytochrome; CytM                                  | 97% | 94% |
| 6 | 8R  | <i>Synechocystis</i> sp. PCC 6803 | cytochrome; CytM                                  | 91% | 87% |
| 6 | 10F | <i>Synechocystis</i> sp. PCC 6803 | cation-transporting ATPase E1–E2 ATPase           | 95% | 20% |
| 6 | 10R | <i>Synechocystis</i> sp. PCC 6803 | cation-transporting ATPase E1–E2 ATPase           | 87% | 44% |
| 6 | 11F | No similarity found               |                                                   |     |     |
| 6 | 11R | <i>Synechocystis</i> sp. PCC 6803 | aspartate aminotransferase                        | 87% | 66% |
| 6 | 12F | <i>Synechocystis</i> sp. PCC 6803 | endo-1,4- $\beta$ -glucanase                      | 99% | 82% |
| 6 | 12R | <i>Synechocystis</i> sp. PCC 6803 | endo-1,4- $\beta$ -glucanase                      | 98% | 94% |
| 6 | 13F | No similarity found               |                                                   |     |     |
| 6 | 13R | No similarity found               |                                                   |     |     |
| 7 | 1F  | <i>Synechocystis</i> sp. PCC 6803 | thiol:disulfide interchange protein DsbD          | 91% | 11% |
| 7 | 1R  | <i>Synechocystis</i> sp. PCC 6803 | thiol:disulfide interchange protein DsbD          | 91% | 9%  |
| 7 | 2F  | <i>Synechocystis</i> sp. PCC 6803 | NAD(P)H-quinone oxidoreductase subunit 4          | 97% | 31% |
| 7 | 2R  | No similarity found               |                                                   |     |     |
| 7 | 4F  | <i>Synechocystis</i> sp. PCC 6803 | cation-transporting ATPase E1–E2 ATPase           | 96% | 51% |
| 7 | 4R  | No similarity found               |                                                   |     |     |
| 7 | 5F  | <i>Synechocystis</i> sp. PCC 6803 | nitrate transport protein NrtD                    | 99% | 68% |
| 7 | 5R  | <i>Synechocystis</i> sp. PCC 6803 | nitrate transport protein NrtD                    | 99% | 98% |
| 7 | 7F  | <i>Synechocystis</i> sp. PCC 6803 | cob(I)yrinic acid a,c-diamide adenosyltransferase | 95% | 90% |
| 7 | 7R  | <i>Synechocystis</i> sp. PCC 6803 | cob(I)yrinic acid a,c-diamide adenosyltransferase | 95% | 60% |
| 7 | 10F | <i>Synechocystis</i> sp. PCC 6803 | cation-transporting ATPase E1–E2 ATPase           | 90% | 87% |
| 7 | 10R | <i>Synechocystis</i> sp. PCC 6803 | cation-transporting ATPase E1–E2 ATPase           | 99% | 98% |
| 7 | 13F | <i>Synechocystis</i> sp. PCC 6803 | thiamine biosynthesis protein ThiC                | 99% | 95% |
| 7 | 13R | <i>Synechocystis</i> sp. PCC 6803 | thiamine biosynthesis protein ThiC                | 95% | 89% |

**Table S2.** Set B. *Cont.*

|   |     |                            |                                          |     |     |
|---|-----|----------------------------|------------------------------------------|-----|-----|
| 7 | 15F | Synechocystis sp. PCC 6803 | dihydroxy-acid dehydratase               | 93% | 46% |
| 7 | 15R | Synechocystis sp. PCC 6803 | dihydroxy-acid dehydratase               | 91% | 40% |
| 8 | 2F  | Synechocystis sp. PCC 6803 | NAD(P)H-quinone oxidoreductase subunit 4 | 99% | 67% |
| 8 | 2R  | No similarity found        |                                          |     |     |
| 8 | 4F  | Synechocystis sp. PCC 6803 | cation-transporting ATPase E1–E2 ATPase  | 99% | 94% |
| 8 | 4R  | Synechocystis sp. PCC 6803 | cation-transporting ATPase E1–E2 ATPase  | 99% | 94% |
| 8 | 5F  | Synechocystis sp. PCC 6803 | nitrate transport protein NrtD           | 96% | 85% |
| 8 | 5R  | Synechocystis sp. PCC 6803 | nitrate transport protein NrtD           | 91% | 34% |
| 8 | 12F | Synechocystis sp. PCC 6803 | endo-1,4- $\beta$ -glucanase             | 99% | 94% |
| 8 | 12R | Synechocystis sp. PCC 6803 | endo-1,4- $\beta$ -glucanase             | 98% | 93% |
| 8 | 14F | No similarity found        |                                          |     |     |
| 8 | 14R | No similarity found        |                                          |     |     |
| 8 | 15F | Synechocystis sp. PCC 6803 | dihydroxy-acid dehydratase               | 94% | 55% |
| 8 | 15R | Synechocystis sp. PCC 6803 | dihydroxy-acid dehydratase               | 88% | 32% |

Set C. *Synechocystis* sp. 6803 coverage sequences.

| Sample | Primer | Organism                          | Protein                                                       | Identity | Query Coverage |
|--------|--------|-----------------------------------|---------------------------------------------------------------|----------|----------------|
| 1      | 5F     | <i>Synechocystis</i> sp. PCC 6803 | nitrate transport protein subunit NrtD                        | 96%      | 90%            |
| 1      | 5R     | <i>Synechocystis</i> sp. PCC 6803 | nitrate transport protein subunit NrtD                        | 95%      | 90%            |
| 2      | 5F     | No similarity found               |                                                               |          |                |
| 2      | 5R     | No similarity found               |                                                               |          |                |
| 2      | 6F     | <i>Synechocystis</i> sp. PCC 6803 | UDP- <i>N</i> -acetylmuramoyl-L-alanyl-D-glutamate synthetase | 89%      | 52%            |
| 2      | 6R     | No similarity found               |                                                               |          |                |
| 2      | 6F     | <i>Synechocystis</i> sp. PCC 6803 | UDP- <i>N</i> -acetylmuramoylalanine--D-glutamate ligase      | 92%      | 92%            |
| 2      | 6R     | <i>Synechocystis</i> sp. PCC 6803 | UDP- <i>N</i> -acetylmuramoylalanine--D-glutamate ligase      | 89%      | 79%            |
| 2      | 8F     | <i>Synechocystis</i> sp. PCC 6803 | cytochrome; CytM                                              | 95%      | 49%            |
| 2      | 8R     | <i>Synechocystis</i> sp. PCC 6803 | solanesyl diphosphate synthase                                | 100%     | 77%            |
| 2      | 15F    | <i>Synechocystis</i> sp. PCC 6803 | dihydroxy-acid dehydratase                                    | 94%      | 74%            |
| 2      | 15R    | <i>Synechocystis</i> sp. PCC 6803 | dihydroxy-acid dehydratase                                    | 95%      | 83%            |

Table S2. Set C. Cont.

|   |     |                                   |                                                          |     |     |
|---|-----|-----------------------------------|----------------------------------------------------------|-----|-----|
| 3 | 3F  | <i>Synechocystis</i> sp. PCC 6803 | iron-regulated protein                                   | 95% | 74% |
| 3 | 3R  | <i>Synechocystis</i> sp. PCC 6803 | iron-regulated protein                                   | 97% | 54% |
| 3 | 4F  | <i>Synechocystis</i> sp. PCC 6803 | cation-transporting ATPase E1–E2 ATPase                  | 98% | 92% |
| 3 | 4R  | <i>Synechocystis</i> sp. PCC 6803 | cation-transporting ATPase E1–E2 ATPase                  | 96% | 93% |
| 3 | 5F  | <i>Synechocystis</i> sp. PCC 6803 | nitrate transport protein NrtD                           | 96% | 77% |
| 3 | 5R  | <i>Synechocystis</i> sp. PCC 6803 | nitrate transport protein NrtD                           | 89% | 36% |
| 3 | 9F  | No similarity                     |                                                          |     |     |
| 3 | 9R  | No similarity                     |                                                          |     |     |
| 3 | 10F | No similarity found               |                                                          |     |     |
| 3 | 10R | No similarity found               |                                                          |     |     |
| 3 | 15F | <i>Synechocystis</i> sp. PCC 6803 | dihydroxy-acid dehydratase                               | 94% | 50% |
| 3 | 15R | <i>Synechocystis</i> sp. PCC 6803 | hypothetical protein                                     | 90% | 37% |
| 4 | 1F  | <i>Synechocystis</i> sp. PCC 6803 | solanesyl diphosphate synthase                           | 97% | 57% |
| 4 | 1R  | <i>Synechocystis</i> sp. PCC 6803 | solanesyl diphosphate synthase                           | 95% | 77% |
| 4 | 2F  | <i>Synechocystis</i> sp. PCC 6803 | NAD(P)H-quinone oxidoreductase subunit 4                 | 97% | 86% |
| 4 | 2R  | <i>Synechocystis</i> sp. PCC 6803 | NAD(P)H-quinone oxidoreductase subunit 4                 | 96% | 89% |
| 4 | 3F  | <i>Synechocystis</i> sp. PCC 6803 | iron-regulated protein                                   | 87% | 34% |
| 4 | 3R  | <i>Synechocystis</i> sp. PCC 6803 | iron-regulated protein                                   | 88% | 19% |
| 4 | 5F  | <i>Synechocystis</i> sp. PCC 6803 | nitrate transport protein subunit NrtD                   | 95% | 92% |
| 4 | 5R  | <i>Synechocystis</i> sp. PCC 6803 | nitrate transport protein subunit NrtD                   | 97% | 88% |
| 4 | 6F  | <i>Synechocystis</i> sp. PCC 6803 | UDP- <i>N</i> -acetylmuramoylalanine--D-glutamate ligase | 97% | 95% |
| 4 | 6R  | <i>Synechocystis</i> sp. PCC 6803 | UDP- <i>N</i> -acetylmuramoylalanine--D-glutamate ligase | 97% | 98% |
| 4 | 7F  | <i>Synechocystis</i> sp. PCC 6803 | cob(I)yrinic acid a,c-diamide adenosyltransferase        | 99% | 63% |
| 4 | 7R  | <i>Synechocystis</i> sp. PCC 6803 | hypothetical protein                                     | 90% | 45% |
| 4 | 10F | <i>Synechocystis</i> sp. PCC 6803 | cation-transporting ATPase E1–E2 ATPase                  | 98% | 98% |
| 4 | 10R | <i>Synechocystis</i> sp. PCC 6803 | cation-transporting ATPase E1–E2 ATPase                  | 99% | 99% |
| 4 | 12F | <i>Synechocystis</i> sp. PCC 6803 | endo-1,4- $\beta$ -glucanase                             | 98% | 93% |
| 4 | 12R | <i>Synechocystis</i> sp. PCC 6803 | endo-1,4- $\beta$ -glucanase                             | 94% | 52% |

Table S2. Set C. Cont.

|   |     |                                   |                                                               |     |     |
|---|-----|-----------------------------------|---------------------------------------------------------------|-----|-----|
| 4 | 14F | <i>Synechocystis</i> sp. PCC 6803 | dihydrodipicolinate synthase                                  | 93% | 81% |
| 4 | 14R | <i>Synechocystis</i> sp. PCC 6803 | solanesyl diphosphate synthase                                | 93% | 16% |
| 5 | 2F  | <i>Synechocystis</i> sp. PCC 6803 | NAD(P)H-quinone oxidoreductase subunit 4                      | 86% | 54% |
| 5 | 2R  | <i>Synechocystis</i> sp. PCC 6803 | NAD(P)H-quinone oxidoreductase subunit 4                      | 98% | 65% |
| 5 | 5F  | <i>Synechocystis</i> sp. PCC 6803 | plasmid pSYSX                                                 | 83% | 32% |
| 5 | 5R  | <i>Synechocystis</i> sp. PCC 6803 | plasmid pSYSX                                                 | 98% | 60% |
| 5 | 6F  | <i>Synechocystis</i> sp. PCC 6803 | UDP- <i>N</i> -acetylmuramoyl-L-alanyl-D-glutamate synthetase | 99% | 87% |
| 5 | 6R  | No similarity found               |                                                               |     |     |
| 5 | 6F  | <i>Synechocystis</i> sp. PCC 6803 | UDP- <i>N</i> -acetylmuramoylalanine--D-glutamate ligase      | 93% | 43% |
| 5 | 6R  | <i>Synechocystis</i> sp. PCC 6803 | UDP- <i>N</i> -acetylmuramoylalanine--D-glutamate ligase      | 89% | 35% |
| 5 | 9F  | <i>Synechocystis</i> sp. PCC 6803 | OmpR subfamily protein Ycf27/Rre26                            | 95% | 90% |
| 5 | 9R  | <i>Synechocystis</i> sp. PCC 6803 | OmpR subfamily protein Ycf27/Rre26                            | 96% | 84% |
| 5 | 10F | <i>Synechocystis</i> sp. PCC 6803 | cation-transporting ATPase E1–E2 ATPase                       | 99% | 98% |
| 5 | 10R | <i>Synechocystis</i> sp. PCC 6803 | cation-transporting ATPase E1–E2 ATPase                       | 99% | 97% |
| 5 | 13F | <i>Synechocystis</i> sp. PCC 6803 | thiamine biosynthesis protein ThiC                            | 85% | 56% |
| 5 | 13R | <i>Synechocystis</i> sp. PCC 6803 | thiamine biosynthesis protein ThiC                            | 96% | 65% |
| 5 | 14F | <i>Synechocystis</i> sp. PCC 6803 | ABC transporter                                               | 95% | 61% |
| 5 | 14R | <i>Synechocystis</i> sp. PCC 6803 | ABC transporter                                               | 99% | 60% |
| 5 | 15F | No similarity                     |                                                               |     |     |
| 5 | 15R | No similarity                     |                                                               |     |     |
| 6 | 1F  | <i>Synechocystis</i> sp. PCC 6803 | solanesyl diphosphate synthase                                | 96% | 79% |
| 6 | 1R  | <i>Synechocystis</i> sp. PCC 6803 | solanesyl diphosphate synthase                                | 97% | 51% |
| 6 | 2F  | <i>Synechocystis</i> sp. PCC 6803 | NADH dehydrogenase subunit 4                                  | 99% | 88% |
| 6 | 2R  | <i>Synechocystis</i> sp. PCC 6803 | NADH dehydrogenase subunit 4                                  | 95% | 91% |
| 6 | 3F  | <i>Synechocystis</i> sp. PCC 6803 | iron-regulated protein                                        | 96% | 62% |
| 6 | 3R  | <i>Synechocystis</i> sp. PCC 6803 | iron-regulated protein                                        | 98% | 69% |
| 6 | 4F  | <i>Synechocystis</i> sp. PCC 6803 | hypothetical protein                                          | 97% | 79% |
| 6 | 4R  | <i>Synechocystis</i> sp. PCC 6803 | cation-transporting ATPase E1–E2 ATPase                       | 99% | 79% |

Table S2. Set C. Cont.

|   |     |                                   |                                                           |     |     |
|---|-----|-----------------------------------|-----------------------------------------------------------|-----|-----|
| 6 | 5F  | <i>Synechocystis</i> sp. PCC 6803 | nitrate transport protein NrtD                            | 96% | 27% |
| 6 | 5R  | <i>Synechocystis</i> sp. PCC 6803 | nitrate transport protein NrtD                            | 93% | 23% |
| 6 | 6F  | <i>Synechocystis</i> sp. PCC 6803 | UDP- <i>N</i> -acetylmuramoylalanine--D-glutamate ligase  | 96% | 88% |
| 6 | 6R  | <i>Synechocystis</i> sp. PCC 6803 | UDP- <i>N</i> -acetylmuramoylalanine--D-glutamate ligase  | 98% | 96% |
| 6 | 8F  | <i>Synechocystis</i> sp. PCC 6803 | DNA gyrase subunit A                                      | 93% | 86% |
| 6 | 8R  | <i>Synechocystis</i> sp. PCC 6803 | DNA gyrase subunit A                                      | 94% | 81% |
| 6 | 9F  | <i>Synechocystis</i> sp. PCC 6803 | arsenate reductase                                        | 96% | 71% |
| 6 | 9R  | <i>Synechocystis</i> sp. PCC 6803 | OmpR subfamily                                            | 88% | 12% |
| 6 | 10F | <i>Synechocystis</i> sp. PCC 6803 | gamma-glutamyl phosphate reductase                        | 99% | 92% |
| 6 | 10R | <i>Synechocystis</i> sp. PCC 6803 | high-affinity branched-chain amino acid transport ATP-bin | 99% | 85% |
| 6 | 12F | <i>Synechocystis</i> sp. PCC 6803 | endo-1,4- $\beta$ -glucanase                              | 97% | 88% |
| 6 | 12R | <i>Synechocystis</i> sp. PCC 6803 | endo-1,4- $\beta$ -glucanase                              | 97% | 91% |
| 6 | 13F | <i>Synechocystis</i> sp. PCC 6803 | thiamine biosynthesis protein ThiC                        | 90% | 52% |
| 6 | 13R | <i>Synechocystis</i> sp. PCC 6803 | serum resistance locus; BrkB                              | 97% | 77% |
| 6 | 14F | <i>Synechocystis</i> sp. PCC 6803 | penicillin-binding protein 4                              | 97% | 75% |
| 6 | 14R | <i>Synechocystis</i> sp. PCC 6803 | dihydrodipicolinate synthase                              | 93% | 62% |
| 7 | 1F  | <i>Synechocystis</i> sp. PCC 6803 | solanesyl diphosphate synthase                            | 94% | 65% |
| 7 | 1R  | <i>Synechocystis</i> sp. PCC 6803 | solanesyl diphosphate synthase                            | 93% | 77% |
| 7 | 4F  | <i>Synechocystis</i> sp. PCC 6803 | cation-transporting ATPase E1–E2 ATPase                   | 99% | 89% |
| 7 | 4R  | <i>Synechocystis</i> sp. PCC 6803 | cation-transporting ATPase E1–E2 ATPase                   | 98% | 86% |
| 7 | 6F  | <i>Synechocystis</i> sp. PCC 6803 | UDP- <i>N</i> -acetylmuramoylalanine--D-glutamate ligase  | 95% | 94% |
| 7 | 6R  | <i>Synechocystis</i> sp. PCC 6803 | UDP- <i>N</i> -acetylmuramoylalanine--D-glutamate ligase  | 95% | 94% |
| 7 | 8F  | <i>Synechocystis</i> sp. PCC 6803 | cytochrome CytM                                           | 95% | 89% |
| 7 | 8R  | <i>Synechocystis</i> sp. PCC 6803 | 50S ribosomal protein L9                                  | 93% | 84% |
| 7 | 9F  | No similarity                     |                                                           |     |     |
| 7 | 9R  | No similarity                     |                                                           |     |     |
| 7 | 13F | <i>Synechocystis</i> sp. PCC 6803 | thiamine biosynthesis protein ThiC                        | 97% | 81% |
| 7 | 13R | <i>Synechocystis</i> sp. PCC 6803 | thiamine biosynthesis protein ThiC                        | 94% | 83% |

**Table S2.** Set C. *Cont.*

|   |     |                                   |                                                              |     |     |
|---|-----|-----------------------------------|--------------------------------------------------------------|-----|-----|
| 7 | 14F | <i>Synechocystis</i> sp. PCC 6803 | hypothetical protein                                         | 93% | 88% |
| 7 | 14R | <i>Synechocystis</i> sp. PCC 6803 | bifunctional nicotinamide mononucleotide<br>adenylyltransfer | 99% | 13% |
| 8 | 1F  | <i>Synechocystis</i> sp. PCC 6803 | solanesyl diphosphate synthase                               | 99% | 93% |
| 8 | 1R  | <i>Synechocystis</i> sp. PCC 6803 | solanesyl diphosphate synthase                               | 99% | 84% |
| 8 | 2F  | <i>Synechocystis</i> sp. PCC 6803 | NAD(P)H-quinone oxidoreductase subunit 4                     | 95% | 29% |
| 8 | 2R  | <i>Synechocystis</i> sp. PCC 6803 | NAD(P)H-quinone oxidoreductase subunit 4                     | 92% | 65% |
| 8 | 3F  | <i>Synechocystis</i> sp. PCC 6803 | iron-regulated protein                                       | 98% | 73% |
| 8 | 3R  | <i>Synechocystis</i> sp. PCC 6803 | iron-regulated protein                                       | 99% | 85% |
| 8 | 4F  | <i>Synechocystis</i> sp. PCC 6803 | cation-transporting ATPase E1–E2 ATPase                      | 95% | 50% |
| 8 | 4R  | <i>Synechocystis</i> sp. PCC 6803 | cation-transporting ATPase E1–E2 ATPase                      | 93% | 54% |
| 8 | 5F  | <i>Synechocystis</i> sp. PCC 6803 | nitrate transport protein NrtD                               | 94% | 88% |
| 8 | 5R  | <i>Synechocystis</i> sp. PCC 6803 | nitrate transport protein NrtD                               | 96% | 77% |
| 8 | 6F  | No similarity found               |                                                              |     |     |
| 8 | 6R  | No similarity found               |                                                              |     |     |
| 8 | 8F  | <i>Synechocystis</i> sp. PCC 6803 | cytochrome; CytM                                             | 98% | 87% |
| 8 | 8R  | <i>Synechocystis</i> sp. PCC 6803 | solanesyl diphosphate synthase                               | 98% | 86% |
| 8 | 10F | <i>Synechocystis</i> sp. PCC 6803 | cation-transporting ATPase E1–E2 ATPase                      | 99% | 99% |
| 8 | 10R | <i>Synechocystis</i> sp. PCC 6803 | cation-transporting ATPase E1–E2 ATPase                      | 99% | 99% |
| 8 | 13F | <i>Synechocystis</i> sp. PCC 6803 | thiamine biosynthesis protein ThiC                           | 98% | 67% |
| 8 | 13R | <i>Synechocystis</i> sp. PCC 6803 | thiamine biosynthesis protein ThiC                           | 98% | 78% |
| 8 | 14F | <i>Synechocystis</i> sp. PCC 6803 | dihydrodipicolinate synthase                                 | 96% | 33% |
| 8 | 14R | <i>Synechocystis</i> sp. PCC 6803 | solanesyl diphosphate synthase                               | 95% | 15% |

**Table S3.** Lysis protocols for *Synechocystis* sp. PCC 6803 and their effects assessed by visual inspection. Each column is a separate protocol numbered in order of attempt. Each “protocol step” cell is subdivided into reagents used, duration, temperature, and observations of the supernatant and cell pellet following centrifugation after each step.

| Conditions         | Protocol 0                         | Protocol 1                                          | Protocol 2                                     | Protocol 3                                     | Protocol 4                                     |
|--------------------|------------------------------------|-----------------------------------------------------|------------------------------------------------|------------------------------------------------|------------------------------------------------|
| <b>Step 1</b>      | 1% Sarkosyl in Buffer A            | 0.1% Sarkosyl in Buffer A                           | 0.1% Sarkosyl in Buffer A                      | 0.1% Sarkosyl in Buffer A                      | 0.1% Sarkosyl in Buffer A                      |
| <b>Time</b>        | 2 h                                | Wash                                                | Wash                                           | Wash                                           | Wash                                           |
| <b>Temperature</b> | 30 °C                              | Room Temp                                           | Room Temp                                      | Room Temp                                      | Room Temp                                      |
| <b>Supernatant</b> | Clear                              | Clear                                               | Clear                                          | Clear                                          | Clear                                          |
| <b>Pellet</b>      | No effect                          | No effect                                           | No effect                                      | No effect                                      | No effect                                      |
| <b>Step 2</b>      | 200 U/μL Lysozyme in TES Buffer    | 10 μg/mL Proteinase K + 0.1% Sarkosyl in TES Buffer | 10 μg/mL Proteinase K + 0.1% SDS in TES Buffer | 10 μg/mL Proteinase K + 0.1% SDS in TES Buffer | 10 μg/mL Proteinase K + 0.1% SDS in TES Buffer |
| <b>Time</b>        | 2 h                                | 2 h                                                 | 2 h                                            | 2 h                                            | 2 h                                            |
| <b>Temperature</b> | 37 °C                              | 57 °C                                               | 57 °C                                          | 57 °C                                          | 57 °C                                          |
| <b>Supernatant</b> | Clear                              | Yellow color                                        | Dark rust color                                | Dark rust color                                | Dark rust color                                |
| <b>Pellet</b>      | No effect                          | No effect                                           | Slight deflation                               | Slight deflation                               | Slight deflation                               |
| <b>Step 3</b>      | 5 μg/mL Proteinase K in TES Buffer | 200 U/μL Lysozyme in TES Buffer                     | 200 U/μL Lysozyme in TES Buffer                | 200 U/μL Lysozyme in SoluLyse                  | 200 U/μL Lysozyme in SoluLyse                  |
| <b>Time</b>        | 1 h                                | 2 h                                                 | 2 h                                            | 2 h                                            | 2 h                                            |
| <b>Temperature</b> | 57 °C                              | 37 °C                                               | 37 °C                                          | 37 °C                                          | 37 °C                                          |
| <b>Supernatant</b> | Clear                              | Clear                                               | Clear                                          | No effect                                      | Gold color                                     |
| <b>Pellet</b>      | No effect                          | No effect                                           | More deflation                                 | Very degraded                                  | Very degraded                                  |
| <b>Step 4</b>      | DLB                                | DLB                                                 | DLB                                            |                                                | DLB                                            |
| <b>Time</b>        | 1 h                                | 1 h                                                 | 1 h                                            |                                                | 1 h                                            |
| <b>Temperature</b> | Room Temp                          | Room Temp                                           | 70 °C                                          |                                                | 37 °C–57 °C                                    |
| <b>Supernatant</b> | Clear                              | Clear                                               | Green                                          |                                                | Gold color                                     |
| <b>Pellet</b>      | No effect                          | No effect                                           | Smaller, brown                                 |                                                | No cell pellet                                 |
